# Supplementary material for: Values, Norms, and Peer Effects on Weight Status
Source: Hindawi journal article supplement (doi:10.1155/2017/2849674), 2017-01-01
Supplement: f1 [file 2849674.f1.pdf]

## Supplementary Materials

TABLE S1: Descriptive statistics.

| Variable                                               | Obs.      | Mean       | Std. Dev. |
|--------------------------------------------------------|-----------|------------|-----------|
| <i>Dependent variable</i>                              |           |            |           |
| BMI (kg/m <sup>2</sup> )                               | 37917     | 25.71      | 4.73      |
| <i>Independent variable</i>                            |           |            |           |
| Average BMI (kg/m <sup>2</sup> )                       | 37917     | 25.70      | 1.74      |
| <i>Individual-based individualism and collectivism</i> |           |            |           |
| Collectivism                                           | 36682     | 0.12       | 0.32      |
| Individualism                                          | 36542     | 0.09       | 0.28      |
| Gender                                                 | 37917     | 0.47       | 0.50      |
| <i>Age groups</i>                                      |           |            |           |
|                                                        | Frequency | Percentage |           |
| Age group: <20 years                                   | 1975      | 5.21       |           |
| Age group: 20-24 years                                 | 2310      | 6.09       |           |
| Age group: 25-29 years                                 | 2528      | 6.67       |           |
| Age group: 30-34 years                                 | 2768      | 7.30       |           |
| Age group: 35-39 years                                 | 3088      | 8.14       |           |
| Age group: 40-44 years                                 | 3008      | 7.93       |           |
| Age group: 45-49 years                                 | 3232      | 8.52       |           |
| Age group: 50-54 years                                 | 3268      | 8.62       |           |
| Age group: 55-59 years                                 | 3340      | 8.81       |           |
| Age group: 60-64 years                                 | 3202      | 8.44       |           |
| Age group: 65-69 years                                 | 3167      | 8.35       |           |
| Age group: ≥70 years                                   | 6031      | 15.91      |           |
| <i>Education levels</i>                                |           |            |           |
| Education: less than lower secondary                   | 3769      | 9.94       |           |
| Education: lower secondary                             | 6355      | 16.76      |           |
| Education: lower tier upper secondary                  | 6896      | 18.19      |           |
| Education: upper tier upper secondary                  | 6746      | 17.79      |           |
| Education: advanced vocational                         | 5426      | 14.41      |           |
| Education: lower tertiary                              | 4178      | 11.02      |           |
| Education: higher tertiary                             | 4547      | 11.99      |           |
| <i>Marital status</i>                                  |           |            |           |
| Marital status: never married                          | 11173     | 29.47      |           |
| Marital status: married                                | 19404     | 51.17      |           |
| Marital status: separated                              | 212       | 0.56       |           |
| Marital status: divorced                               | 3873      | 10.21      |           |
| Marital status: widowed                                | 3255      | 8.58       |           |
| <i>Household relative income</i>                       |           |            |           |
| Household income: very difficult on present income     | 1981      | 5.22       |           |
| Household income: difficult on present income          | 6093      | 16.07      |           |
| Household income: coping on present income             | 17495     | 46.14      |           |
| Household income: living comfortably on present income | 12348     | 32.57      |           |
| <i>Country</i>                                         |           |            |           |
| Austria                                                | 1724      | 4.55       |           |
| Belgium                                                | 1675      | 4.42       |           |
| Switzerland                                            | 1490      | 3.93       |           |
| Czech Republic                                         | 1877      | 4.95       |           |
| Germany                                                | 2925      | 7.71       |           |
| Denmark                                                | 1459      | 3.85       |           |
| Estonia                                                | 1993      | 5.26       |           |

|                 |      |      |
|-----------------|------|------|
| Spain           | 1808 | 4.77 |
| Finland         | 2025 | 5.34 |
| France          | 1866 | 4.92 |
| The UK          | 2040 | 5.38 |
| Hungary         | 1615 | 4.26 |
| Ireland         | 2062 | 5.44 |
| Israel          | 2324 | 6.13 |
| Lithuania       | 2087 | 5.50 |
| The Netherlands | 1879 | 4.96 |
| Norway          | 1398 | 3.69 |
| Poland          | 1553 | 4.10 |
| Portugal        | 1219 | 3.21 |
| Sweden          | 1738 | 4.58 |
| Slovenia        | 1160 | 3.06 |

Average BMI is the average BMI separated by gender, age bands and country. For education, marital status, age groups, household Income, and country, we report the number of observations (frequency) and the percentage in each category. Obs. = observations. Std. Dev. = standard deviation.  
Source: the European Social Survey (ESS) 2014

TABLE S2: Individualism versus collectivism at country/individual levels.

| Country         | Country-based       |                                       | Individual-based |                |
|-----------------|---------------------|---------------------------------------|------------------|----------------|
|                 | Individualism score | Individualistic versus collectivistic | Individualistic  | collectivistic |
| Portugal        | 27                  | collectivistic                        | 0.076            | 0.093          |
| Slovenia        | 27                  | collectivistic                        | 0.069            | 0.032          |
| Spain           | 51                  | collectivistic                        | 0.032            | 0.202          |
| Israel          | 54                  | collectivistic                        | 0.131            | 0.063          |
| Austria         | 55                  | collectivistic                        | 0.093            | 0.095          |
| Czech Republic  | 58                  | collectivistic                        | 0.172            | 0.037          |
| Estonia         | 60                  | collectivistic                        | 0.089            | 0.114          |
| Lithuania       | 60                  | collectivistic                        | 0.270            | 0.026          |
| Poland          | 60                  | collectivistic                        | 0.106            | 0.075          |
| Finland         | 63                  | individualistic                       | 0.038            | 0.210          |
| Germany         | 67                  | individualistic                       | 0.049            | 0.185          |
| Switzerland     | 68                  | individualistic                       | 0.075            | 0.115          |
| Norway          | 69                  | individualistic                       | 0.072            | 0.126          |
| Ireland         | 70                  | individualistic                       | 0.088            | 0.088          |
| France          | 71                  | individualistic                       | 0.033            | 0.193          |
| Sweden          | 71                  | individualistic                       | 0.040            | 0.222          |
| Denmark         | 74                  | individualistic                       | 0.074            | 0.137          |
| Belgium         | 75                  | individualistic                       | 0.063            | 0.081          |
| Hungary         | 80                  | individualistic                       | 0.156            | 0.046          |
| The Netherlands | 80                  | individualistic                       | 0.076            | 0.085          |
| The UK          | 89                  | individualistic                       | 0.055            | 0.151          |

Source: At the country level, individualism score is from Hofstede (2001). At the individual level, individualistic is for those individuals have 75% or above centered values of achievement and power. Collectivistic is for those individuals have 75% or above centered values of universalism and benevolence.

TABLE S3: Schwartz's ten human values for 21 individual value items.

| Ten Human Values    | Items in index of the ESS |
|---------------------|---------------------------|
| Conformity (CO)     | vii, xvi                  |
| Tradition (TR)      | ix, xx                    |
| Benevolence (BE)    | xii, xviii                |
| Universalism (UN)   | iii, viii, xix            |
| Self-Direction (SD) | i, xi                     |
| Stimulation (ST)    | vi, xv                    |
| Hedonism (HE)       | x, xxi                    |
| Achievement (AC)    | iv, xiii                  |
| Power (PO)          | ii, xvii                  |
| Security (SE)       | v, xiv                    |

Source: Schwartz (2003).

TABLE S4 OLS estimates of average BMI on individual BMI (using top 5 and bottom 5 countries).

|                            | All<br>(1)          | Individualistic<br>(2) | Collectivistic<br>(3) |
|----------------------------|---------------------|------------------------|-----------------------|
| Average BMI                | 0.339***<br>(0.072) | -0.065<br>(0.112)      | 0.300***<br>(0.100)   |
| 95% CI                     | [0.199,0.480]       | [-0.284,0.155]         | [0.104,0.497]         |
| <i>N</i>                   | 16903               | 8668                   | 8235                  |
| Adj. <i>R</i> <sup>2</sup> | 0.111               | 0.091                  | 0.163                 |

The dependent variable is individual BMI. Individualistic countries are Denmark, Belgium, Hungary, the Netherlands and the UK. Collectivistic countries are Portugal, Slovenia, Spain, Israel and Austria. Controls are average BMI (from its country\*age band\*gender cell), individual characteristics (dummies of age groups (with <20 as the reference group), gender, marital status, education), household income (4-point scale, with 1=very difficult on present income as the reference) and country dummies. Robust standard errors are in parentheses, 95% confidence intervals (CI) are in brackets. \*  $p < 0.1$ , \*\*  $p < 0.05$ , \*\*\*  $p < 0.01$ .

TABLE S5 OLS estimates of average BMI on individual BMI.

|                                     | All                 |
|-------------------------------------|---------------------|
| Average BMI                         | 0.566***<br>(0.113) |
| 95% CI                              | [0.344,0.787]       |
| Individualistic score               | 0.080<br>(0.049)    |
| 95% CI                              | [-0.016,0.176]      |
| Average BMI X Individualistic score | -0.003*<br>(0.002)  |
| 95% CI                              | [-0.007,0.0003]     |
| <i>N</i>                            | 37917               |
| Adj. <i>R</i> <sup>2</sup>          | 0.131               |

The dependent variable is individual BMI. Controls are average BMI (from its country\*age band\*gender cell), individualistic score and its interaction with average BMI, individual characteristics (dummies of age groups (with <20 as the reference group), gender, marital status, education), household income (4-point scale, with 1=very difficult on present income as the reference) and country dummies. Robust standard errors are in parentheses, 95% confidence intervals (CI) are in brackets. \*  $p < 0.1$ , \*\*  $p < 0.05$ , \*\*\*  $p < 0.01$ .

TABLE S6: OLS/Probit estimates of average BMI/overweight on individual BMI/overweight (individual-based individualistic versus collectivistic).

| OLS estimates                                        |                     |                     |
|------------------------------------------------------|---------------------|---------------------|
| Panel A: dependent variable is individual BMI        | Individualistic     | Collectivistic      |
| Average BMI                                          | 0.376***<br>(0.099) | 0.356***<br>(0.093) |
| 95% CI                                               | [0.183,0.570]       | [0.174,0.538]       |
| <i>N</i>                                             | 12236               | 12661               |
| Adj. <i>R</i> <sup>2</sup>                           | 0.167               | 0.110               |
| Probit estimates                                     |                     |                     |
| Panel B: dependent variable is individual overweight | Individualistic     | Collectivistic      |
| Proportion of overweight                             | 0.388***<br>(0.096) | 0.420***<br>(0.089) |
| 95% CI                                               | [0.199,0.577]       | [0.246,0.595]       |
| <i>N</i>                                             | 12236               | 12661               |
| Pseudo <i>R</i> <sup>2</sup>                         | 0.135               | 0.086               |

The dependent variable is individual BMI or individual overweight status (1 if BMI  $\geq 25$  kg/m<sup>2</sup>, 0 otherwise). Individualistic is for those individuals have 50% or above centered values of achievement and power. Collectivistic is for those individuals have 50% or above centered values of universalism and benevolence. Controls are average BMI or proportion of overweight (from its country\*age band\*gender cell), and its interaction with four human values factors (universalism, benevolence, achievement and power), individual characteristics (dummies of age groups (with <20 as the reference group), gender, marital status, education), household income (4-point scale, with 1=very difficult on present income as the reference) and country dummies. Robust standard errors are in parentheses, 95% confidence intervals (CI) are in brackets. Marginal effects are reported in the panel B. \*  $p < 0.1$ , \*\*  $p < 0.05$ , \*\*\*  $p < 0.01$ .
